# Supplementary material
Source: publisher site journal article supplement (https://www.spandidos-publications.com/3730/downloadSupplementary)
Supplement: Supplementary file 1 [file downloadSupplementary]

Figure S1. Pathological examination images of 5 patients with GHGIN. GHGIN, gastric high-grade intraepithelial neoplasia.

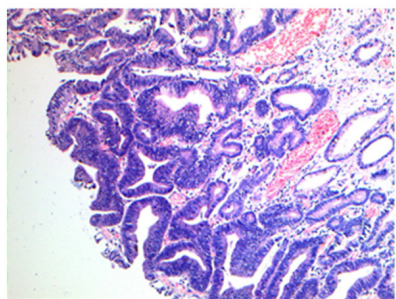

GHGIN1

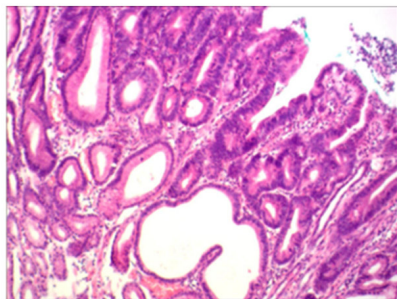

GHGIN2

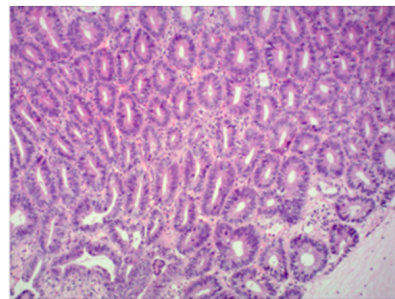

GHGIN3

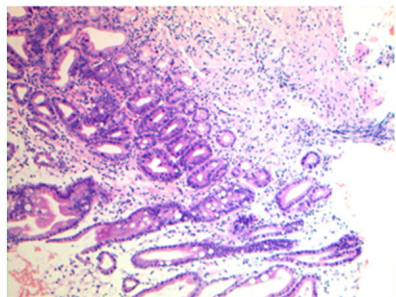

GHGIN4

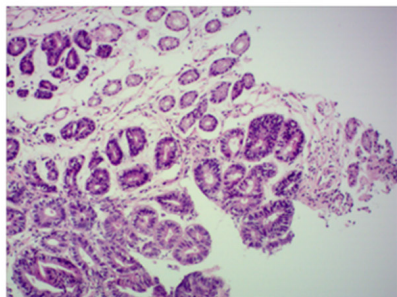

GHGIN5
